# Supplementary material for: The wheat Phs-A1 pre-harvest sprouting resistance locus delays the rate of seed dormancy loss and maps 0.3 cM distal to the PM19 genes in UK germplasm
Source: PubMed Central journal article supplement (PMC5301926; doi:10.1093/jxb/erw194), 2016-05-23
Supplement: supp_erw194_supplementary_figures_S1_S5_Tables_S1_S6.pdf [file supp_erw194_supplementary_figures_S1_S5_Tables_S1_S6.pdf]

## Supplementary Data

### The wheat *Phs-A1* pre-harvest sprouting resistance locus delays dormancy loss during seed after-ripening and maps 0.3 cM distal to the *PM19* genes in UK germplasm.

Oluwaseyi Shorinola, Nicholas Bird, James Simmonds, Simon Berry, Tina Henriksson, Peter Jack, Peter Werner, Tanja Gerjets, Duncan Scholefield, Barbara Balcárková, Miroslav Valárik, Michael J Holdsworth, John Flintham, and Cristobal Uauy.

**Fig S1:** PHS resistance QTL on chromosome arm 4AL in the Alchemy x Robigus DH population.

**Fig S2:** After-ripening effect of *Phs-A1* in NILs grown at 13 °C post-anthesis.

**Fig S3:** Distribution of the sprouting percentage of Option x Claire F4 RILs in sprouting experiment 3.

**Fig S4:** Alignment of *PM19-A1* coding sequences of UK and Australian germplasm.

**Fig S5:** Alignment of *PM19-A2* coding sequences of UK and Australian germplasm.

**Table S1:** Statistical comparison of the GI and sprouting phenotype of Alchemy x Robigus NILs.

**Table S2:** Information on genes found in the syntenic *Phs-A1* intervals in wheat and *Brachypodium*.

**Table S3:** KASP SNP assays used to fine map *Phs-A1*.

**Table S4:** Statistical comparison of the sprouting scores of Option x Claire RILs in sprouting experiment 3.

**Table S5:** Statistical comparison of the sprouting score of Option x Claire RILs in sprouting experiment 4.

**Table S6:** Statistical comparison of the sprouting score of Alchemy x Robigus RILs in sprouting experiment 5.

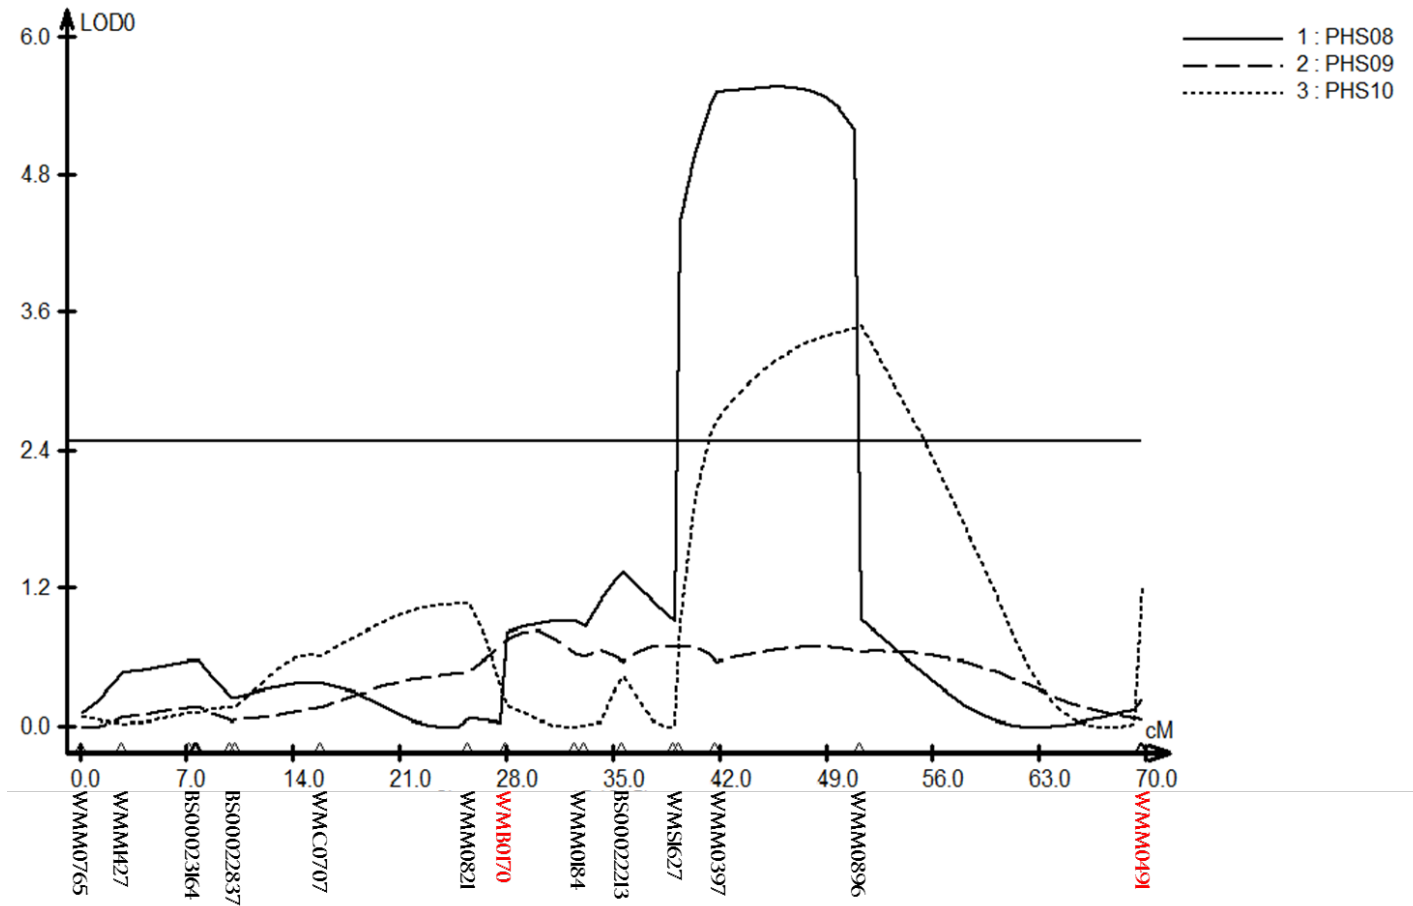

**Fig S1: PHS resistance QTL on chromosome arm 4AL in the Alchemy x Robigus DH population.** A QTL for PHS resistance was identified from composite interval mapping of the arcsin transformed sprouting percentage of DH lines phenotyped across three years of field trial (2008, 2009 and 2010). QTL was detected in 2008 and 2010 but not in 2009. The flanking markers used for selecting the QTL are highlighted in red.

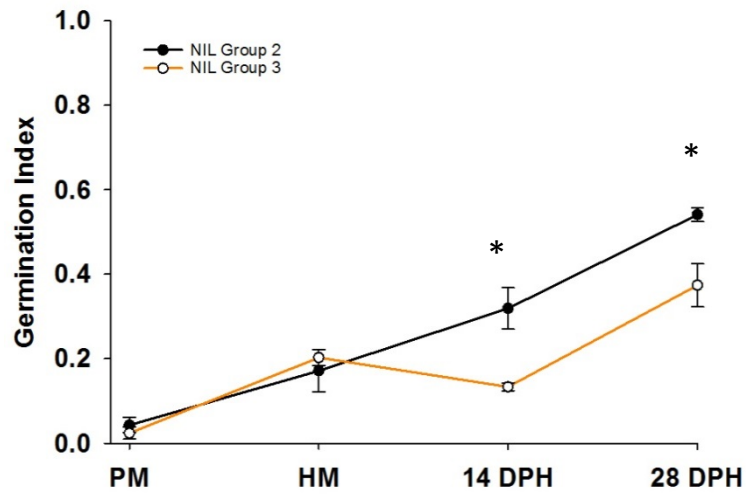

**Fig S2: After-ripening effect of *Phs-A1* in NILs grown at 13 °C post-anthesis.** The germination index of seeds harvested from NILs with either the recombinant haplotype (NIL Group 2) or Alchemy-type haplotype (NIL Group 3) between *barc170* and *wmc420* grown at 13 °C post-anthesis. Seeds were tested at Physiological Maturity (PM), Harvest Maturity (HM; 12 days after PM), 14 and 28 Days Post Harvest (DPH). Error bars represent SEM of 3 biological replications for each time point. Significant differences between NILs at  $P < 0.05$  (\*) is indicated

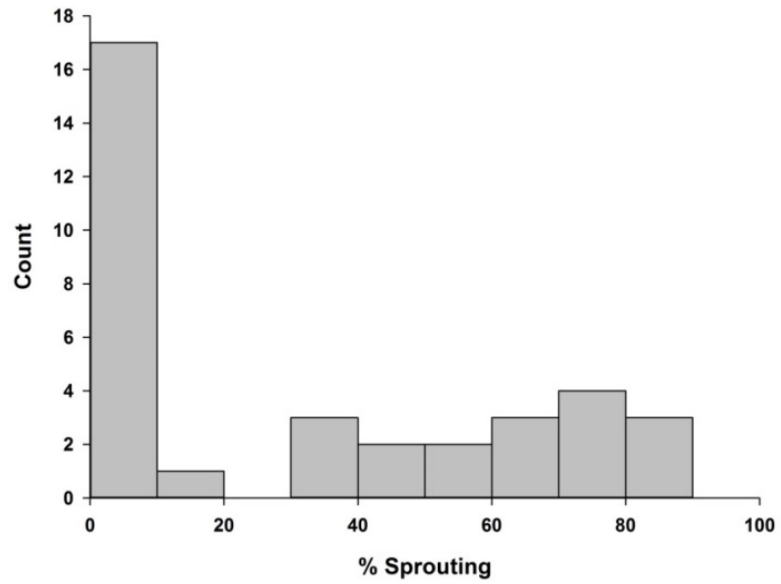

**Fig S3: Distribution of the sprouting percentage of Option x Claire F4 RILs in sprouting experiment 3.**

```

PM19-A1_Alchemy ATGGCGGGCGTGGGTGCGCAACATGGTGGCGCCGCTGCTGGTGTGAACCTCATCATGTACCTCATCGTCATCGGCTTCGCGAGCTGGAACCTCAACCCTTCATCAACGGCCTCACCAAC 120
PM19-A1_Option ATGGCGGGCGTGGGTGCGCAACATGGTGGCGCCGCTGCTGGTGTGAACCTCATCATGTACCTCATCGTCATCGGCTTCGCGAGCTGGAACCTCAACCCTTCATCAACGGCCTCACCAAC 120
PM19-A1_Yitpi ATGGCGGGCGTGGGTGCGCAACATGGTGGCGCCGCTGCTGGTGTGAACCTCATCATGTACCTCATCGTCATCGGCTTCGCGAGCTGGAACCTCAACCCTTCATCAACGGCCTCACCAAC 120
PM19-A1_Claire ATGGCGGGCGTGGGTGCGTAACATGGTGGCGCCGCTGCTGGTGTGAACCTCATCATGTACATCATCGTCATAGGGTTTCGCGAGCTGGAACCTCAACCCTTCATCAACGGCCTCACCAAC 120
PM19-A1_Robigus ATGGCGGGCGTGGGTGCGTAACATGGTGGCGCCGCTGCTGGTGTGAACCTCATCATGTACATCATCGTCATAGGGTTTCGCGAGCTGGAACCTCAACCCTTCATCAACGGCCTCACCAAC 120
PM19-A1_Chara ATGGCGGGCGTGGGTGCGTAACATGGTGGCGCCGCTGCTGGTGTGAACCTCATCATGTACATCATCGTCATAGGGTTTCGCGAGCTGGAACCTCAACCCTTCATCAACGGCCTCACCAAC 120
***** ** * * *****.*****.*****

PM19-A1_Alchemy CGCCCCGGCGTCGGCGGCAACGGCGCCACCTTCTACTTCTCCTCGTCTTCGCCATCCTCGCCGGGGTTCGTTGGGCGCCGCATCCAAGCTCGCCGGCGTGCACCACGTCGCGACCTGGCGGGC 240
PM19-A1_Option CGCCCCGGCGTCGGCGGCAACGGCGCCACCTTCTACTTCTCCTCGTCTTCGCCATCCTCGCCGGGGTTCGTTGGGCGCCGCATCCAAGCTCGCCGGCGTGCACCACGTCGCGACCTGGCGGGC 240
PM19-A1_Yitpi CGCCCCGGCGTCGGCGGCAACGGCGCCACCTTCTACTTCTCCTCGTCTTCGCCATCCTCGCCGGGGTTCGTTGGGCGCCGCATCCAAGCTCGCCGGCGTGCACCACGTCGCGACCTGGCGGGC 240
PM19-A1_Claire CGCCCCGGCGTCGGCGGCAACGGCGCCACCTTCTACTTCTCCTCGTCTTCGCCATCCTCGCCGGGGTTCGTTGGGCGCCGCATCCAAGCTCGCCGGCGTGCACCACGTCGCGACCTGGCGGGC 240
PM19-A1_Robigus CGCCCCGGCGTCGGCGGCAACGGCGCCACCTTCTACTTCTCCTCGTCTTCGCCATCCTCGCCGGGGTTCGTTGGGCGCCGCATCCAAGCTCGCCGGCGTGCACCACGTCGCGACCTGGCGGGC 240
PM19-A1_Chara CGCCCCGGCGTCGGCGGCAACGGCGCCACCTTCTACTTCTCCTCGTCTTCGCCATCCTCGCCGGGGTTCGTTGGGCGCCGCATCCAAGCTCGCCGGCGTGCACCACGTCGCGACCTGGCGGGC 240
*****

PM19-A1_Alchemy GACAGCCTCGCCACCTCCGCGTCCCTCCTCGCTGGTGGCCTGGGCGATCACCGCCTTGGCGTTCGGGCTGGCGTGAAGGAGATCCACATCGGCGGGTACCAGGGTGGCGCCTCCGGGTG 360
PM19-A1_Option GACAGCCTCGCCACCTCCGCGTCCCTCCTCGCTGGTGGCCTGGGCGATCACCGCCTTGGCGTTCGGGCTGGCGTGAAGGAGATCCACATCGGCGGGTACCAGGGTGGCGCCTCCGGGTG 360
PM19-A1_Yitpi GACAGCCTCGCCACCTCCGCGTCCCTCCTCGCTGGTGGCCTGGGCGATCACCGCCTTGGCGTTCGGGCTGGCGTGAAGGAGATCCACATCGGCGGGTACCAGGGTGGCGCCTCCGGGTG 360
PM19-A1_Claire GACAGCCTCGCCACCTCCGCGTCCCTCCTCGCTGGTGGCCTGGGCGATCACCGCCTTGGCGTTCGGGCTGGCGTGAAGGAGATCCACATCGGCGGGTACCAGGGTGGCGCCTCCGGGTG 360
PM19-A1_Robigus GACAGCCTCGCCACCTCCGCGTCCCTCCTCGCTGGTGGCCTGGGCGATCACCGCCTTGGCGTTCGGGCTGGCGTGAAGGAGATCCACATCGGCGGGTACCAGGGTGGCGCCTCCGGGTG 360
PM19-A1_Chara GACAGCCTCGCCACCTCCGCGTCCCTCCTCGCTGGTGGCCTGGGCGATCACCGCCTTGGCGTTCGGGCTGGCGTGAAGGAGATCCACATCGGCGGGTACCAGGGTGGCGCCTCCGGGTG 360
*****

PM19-A1_Alchemy CTGGAGGCGTTCGTGATTGTTCTCATGTTACGCGAGCTGCTGTACGTGCTGGCGCTGCACTCGGGCCTCTTCGGGAACCAGTTTCGGTGGTAACCATGGTGGTGGGTATCCGGCGGAGCAC 480
PM19-A1_Option CTGGAGGCGTTCGTGATTGTTCTCATGTTACGCGAGCTGCTGTACGTGCTGGCGCTGCACTCGGGCCTCTTCGGGAACCAGTTTCGGTGGTAACCATGGTGGTGGGTATCCGGCGGAGCAC 480
PM19-A1_Yitpi CTGGAGGCGTTCGTGATTGTTCTCATGTTACGCGAGCTGCTGTACGTGCTGGCGCTGCACTCGGGCCTCTTCGGGAACCAGTTTCGGTGGTAACCATGGTGGTGGGTATCCGGCGGAGCAC 480
PM19-A1_Claire CTGGAGGCGTTCGTGATTGTTCTCATGTTACGCGAGCTGCTGTACGTGCTGGCGCTGCACTCGGGCCTCTTCGGGAACCAGTTTCGGTGGTAACCATGGTGGTGGGTATCCGGCGGAGCAC 480
PM19-A1_Robigus CTGGAGGCGTTCGTGATTGTTCTCATGTTACGCGAGCTGCTGTACGTGCTGGCGCTGCACTCGGGCCTCTTCGGGAACCAGTTTCGGTGGTAACCATGGTGGTGGGTATCCGGCGGAGCAC 480
PM19-A1_Chara CTGGAGGCGTTCGTGATTGTTCTCATGTTACGCGAGCTGCTGTACGTGCTGGCGCTGCACTCGGGCCTCTTCGGGAACCAGTTTCGGTGGTAACCATGGTGGTGGGTATCCGGCGGAGCAC 480
*****

PM19-A1_Alchemy GCGTACGGCGCAGGCGTCGGCGACCCGCACAACAAGGGCATGGGCATGGGCACCAG-----GGTCTGA 543
PM19-A1_Option GCGTACGGCGCAGGCGTCGGCGACCCGCACAACAAGGGCATGGGCATGGGCACCAG-----GGTCTGA 543
PM19-A1_Yitpi GCGTACGGCGCAGGCGTCGGCGACCCGCACAACAAGGGCATGGGCATGGGCACCAG-----GGTCTGA 543
PM19-A1_Claire GCGTACGGCGCAGGCGTCGGCGACCCGCACAACAAGGGCATGGGCATGGGCACCAGCGGGGTCGCCAGGGTCTGA 555
PM19-A1_Robigus GCGTACGGCGCAGGCGTCGGCGACCCGCACAACAAGGGCATGGGCATGGGCACCAGCGGGGTCGCCAGGGTCTGA 555
PM19-A1_Chara GCGTACGGCGCAGGCGTCGGCGACCCGCACAACAAGGGCATGGGCATGGGCACCAG-----GGTCTGA 543
*****

```

**Fig S4: Alignment of *PM19-A1* coding sequences of UK and Australian germplasm.** The coding sequences of *PM19-A1* in Alchemy, Option, Robigus, Claire, Yitpi and Chara *PM19-A1* were aligned with Clustal Omega and the polymorphisms are shown in red.

```

PM19-A2_Claire      ATGGCGGGCGTGGGTCGCAACATGGTGGCGCCGCTGCTGGTGTGAACCTCATCATGTACCTCATCGTTCATCGGCTTCGCGAGCTGGAACCTCAACCCTTCATCAACGGCCTCACCAAC 120
PM19-A2_Robigus    ATGGCGGGCGTGGGTCGCAACATGGTGGCGCCGCTGCTGGTGTGAACCTCATCATGTACCTCATCGTTCATCGGCTTCGCGAGCTGGAACCTCAACCCTTCATCAACGGCCTCACCAAC 120
PM19-A2_Chara      ATGGCGGGCGTGGGTCGCAACATGGTGGCGCCGCTGCTGGTGTGAACCTCATCATGTACCTCATCGTTCATCGGCTTCGCGAGCTGGAACCTCAACCCTTCATCAACGGCCTCACCAAC 120
PM19-A2_Yitpi      ATGGCGGGCGTGGGTCGCAACATGGTGGCGCCGCTGCTGGTGTGAACCTCATCATGTACCTCATCGTTCATCGGCTTCGCGAGCTGGAACCTCAACCCTTCATCAACGGCCTCACCAAC 120
PM19-A2_Alchemy    ATGGCGGGCGTGGGTCGCAACATGGTGGCGCCGCTGCTGGTGTGAACCTCATCATGTACCTCATCGTTCATCGGCTTCGCGAGCTGGAACCTCAACCCTTCATCAACGGCCTCACCAAC 120
PM19-A2_Option     ATGGCGGGCGTGGGTCGCAACATGGTGGCGCCGCTGCTGGTGTGAACCTCATCATGTACCTCATCGTTCATCGGCTTCGCGAGCTGGAACCTCAACCCTTCATCAACGGCCTCACCAAC 120
*****. **

PM19-A2_Claire      CGCCCCGGCGTCGGCGGCAACGGCGCCACCTTCTACTTCTCCTCGTCTTCGCCATCCTCGCCGGGGTTCGTTGGGCGCCGATCCAAGCTCGCCGGCGTGCACCACGTCCGCACCTGGCGGGC 240
PM19-A2_Robigus    CGCCCCGGCGTCGGCGGCAACGGCGCCACCTTCTACTTCTCCTCGTCTTCGCCATCCTCGCCGGGGTTCGTTGGGCGCCGATCCAAGCTCGCCGGCGTGCACCACGTCCGCACCTGGCGGGC 240
PM19-A2_Chara      CGCCCCGGCGTCGGCGGCAACGGCGCCACCTTCTACTTCTCCTCGTCTTCGCCATCCTCGCCGGGGTTCGTTGGGCGCCGATCCAAGCTCGCCGGCGTGCACCACGTCCGCACCTGGCATGGG 240
PM19-A2_Yitpi      CGCCCCGGCGTCGGCGGCAACGGCGCCACCTTCTACTTCTCCTCGTCTTCGCCATCCTCGCCGGGGTTCGTTGGGCGCCGATCCAAGCTCGCCGGCGTGCACCACGTCCGCACCTGGCATGGG 240
PM19-A2_Alchemy    CGCCCCGGCGTCGGCGGCAACGGCGCCACCTTCTACTTCTCCTCGTCTTCGCCATCCTCGCCGGGGTTCGTTGGGCGCCGATCCAAGCTCGCCGGCGTGCACCACGTCCGCACCTGGCATGGG 240
PM19-A2_Option     CGCCCCGGCGTCGGCGGCAACGGCGCCACCTTCTACTTCTCCTCGTCTTCGCCATCCTCGCCGGGGTTCGTTGGGCGCCGATCCAAGCTCGCCGGCGTGCACCACGTCCGCACCTGGCATGGG 240
*****. **

PM19-A2_Claire      GACAGCCTCGCCACCTCCGCGTCCCTCCTCGCTGGTGGCCTGGGCGATCACCGCCTTGGCGTTCGGGCTGGCGTGAAGGAGATCCACATCGCCGGGTACCGAGGGTGGCGCCTCCGGGTG 360
PM19-A2_Robigus    GACAGCCTCGCCACCTCCGCGTCCCTCCTCGCTGGTGGCCTGGGCGATCACCGCCTTGGCGTTCGGGCTGGCGTGAAGGAGATCCACATCGCCGGGTACCGAGGGTGGCGCCTCCGGGTG 360
PM19-A2_Chara      GACAGCCTCGCCACCTCCGCGTCCCTCCTCGCTGGTGGCCTGGGCGATCACCGCCTTGGCGTTCGGGCTGGCGTGAAGGAGATCCACATCGCCGGGTACCGAGGGTGGCGCCTCCGGGTG 360
PM19-A2_Yitpi      GACAGCCTCGCCACCTCCGCGTCCCTCCTCGCTGGTGGCCTGGGCGATCACCGCCTTGGCGTTCGGGCTGGCGTGAAGGAGATCCACATCGCCGGGTACCGAGGGTGGCGCCTCCGGGTG 360
PM19-A2_Alchemy    GACAGCCTCGCCACCTCCGCGTCCCTCCTCGCTGGTGGCCTGGGCGATCACCGCCTTGGCGTTCGGGCTGGCGTGAAGGAGATCCACATCGCCGGGTACCGAGGGTGGCGCCTCCGGGTG 360
PM19-A2_Option     GACAGCCTCGCCACCTCCGCGTCCCTCCTCGCTGGTGGCCTGGGCGATCACCGCCTTGGCGTTCGGGCTGGCGTGAAGGAGATCCACATCGCCGGGTACCGAGGGTGGCGCCTCCGGGTG 360
*****

PM19-A2_Claire      CTGGAGGCGTTCGTATCATCCTGGCCTTACGCGAGTGTCTACGTGTGGCGTGCCTCTGGGCTGTTTGGCAACCAGTTTGGTAACCATGCTGGTGGATAACGGCGGGAGCACGGC 480
PM19-A2_Robigus    CTGGAGGCGTTCGTATCATCCTGGCCTTACGCGAGTGTCTACGTGTGGCGTGCCTCTGGGCTGTTTGGCAACCAGTTTGGTAACCATGCTGGTGGATAACGGCGGGAGCACGGC 480
PM19-A2_Chara      CTGGAGGCGTTCGTATCATCCTGGCCTTACGCGAGTGTCTACGTGTGGCGTGCCTCTGGGCTGTTTGGCAACCAGTTTGGTAACCATGCTGGTGGATAACGGCGGGAGCACGGC 480
PM19-A2_Yitpi      CTGGAGGCGTTCGTATCATCCTGGTCTTACGCGAGTGTCTACGTGTGGCGTGCCTCTGGGCTGTTT-----GGTAACCATGCTGGTGGATAACGGCGGGAGCACGGC 468
PM19-A2_Alchemy    CTGGAGGCGTTCGTATCATCCTGGTCTTACGCGAGTGTCTACGTGTGGCGTGCCTCTGGGCTGTTT-----GGTAACCATGCTGGTGGATAACGGCGGGAGCACGGC 468
PM19-A2_Option     CTGGAGGCGTTCGTATCATCCTGGTCTTACGCGAGTGTCT-----GGTAACCATGCTGGTGGATAACGGCGGGAGCACGGC-----401
*****

PM19-A2_Claire      GGGTATGGCGCCGGCGATCCGCACAATAAGGGCATGGGCACCGGGCGGCGTCCGAGGGTCTGA 543
PM19-A2_Robigus    GGGTATGGCGCCGGCGATCCGCACAATAAGGGCATGGGCACCGGGCGGCGTCCGAGGGTCTGA 543
PM19-A2_Chara      GGGTATGGCGCCGGCGATCCGCACAATAAGGGCATGGGCACCGGGCGGCGTCCGAGGGTCTGA 543
PM19-A2_Yitpi      GGGTATGGCGCCGGCGATCCGCACAATAAGGGCATGGGCACCGGGCGGCGTCCGAGGGTCTGA 531
PM19-A2_Alchemy    GGGTATGGCGCCGGCGATCCGCACAATAAGGGCATGGGCACCGGGCGGCGTCCGAGGGTCTGA 531
PM19-A2_Option     -----401

```

**Fig S5: Alignment of *PM19-A2* coding sequences of UK and Australian germplasm.**The coding sequences of *PM19-A2* in Alchemy, Option, Robigus, Claire, Yitpi and Chara were aligned with Clustal omega and the polymorphisms are shown in red. Partial *PM19-A2* sequence was obtained for Option.

**Table S1: Statistical comparison of GI and sprouting phenotype of Alchemy x Robigus NILs**

| Test                     | Lines   | Mean | Std Error | Sig (P) against Alchemy | Sig (P) against Robigus | Phenotype Classification |
|--------------------------|---------|------|-----------|-------------------------|-------------------------|--------------------------|
| GI                       | Alchemy | 0.1  | 0.01      | NA                      | < 0.001                 | Low                      |
|                          | Robigus | 0.9  | 0.02      | < 0.001                 | NA                      | High                     |
|                          | Group 1 | 0.8  | 0.06      | < 0.001                 | 0.895                   | High                     |
|                          | Group 2 | 0.9  | 0.01      | < 0.001                 | 0.998                   | High                     |
|                          | Group 3 | 0.4  | 0.05      | < 0.001                 | < 0.001                 | Moderate                 |
|                          | Group 4 | 0.9  | 0.01      | < 0.001                 | 0.994                   | High                     |
|                          | Group 5 | 0.8  | 0.05      | < 0.001                 | 0.908                   | High                     |
|                          | Group 6 | 0.7  | 0.04      | < 0.001                 | 0.009                   | Moderate                 |
| Group 7                  | 0.9     | 0.02 | < 0.001   | 0.895                   | High                    |                          |
| %<br>Sprouting<br>Arcsin | Alchemy | 9.0  | 1.68      | -                       | 0.002                   | Low                      |
|                          | Robigus | 27.9 | 2.21      | 0.002                   | -                       | High                     |
|                          | Group 1 | 39.7 | 3.52      | < 0.001                 | 0.044                   | High                     |
|                          | Group 2 | 27.0 | 2.41      | < 0.001                 | 1                       | High                     |
|                          | Group 3 | 7.5  | 0.98      | 1                       | < 0.001                 | Low                      |
|                          | Group 4 | 49.8 | 3.14      | < 0.001                 | < 0.001                 | High                     |
|                          | Group 5 | 27.5 | 2.27      | < 0.001                 | 1                       | High                     |
|                          | Group 6 | 29.1 | 3.30      | < 0.001                 | 1                       | High                     |
| Group 7                  | 31.5    | 2.18 | < 0.001   | 0.92                    | High                    |                          |

**Table S2: Information on genes found in the syntenic *Phs-A1* intervals in wheat and *Brachypodium*.**

|           | <i>Brachypodium</i><br>genes | IWGSC CSS<br>Contigs | Gene model ID        | Gene Names                                                              |
|-----------|------------------------------|----------------------|----------------------|-------------------------------------------------------------------------|
| <b>1</b>  | <i>Bradi1g00600</i>          | 4AL_7123764          | Traes_4AL_BFAB568BF  | <i>Plasma Membrane Protein 19-A2 (PM19-A1)</i>                          |
|           |                              | 4AL_7174272          | Traes_4AL_F99FCB25F  | <i>Plasma Membrane Protein 19-A2 (PM19-A2)</i>                          |
| <b>2</b>  | <i>Bradi1g00607</i>          | 4AL_7174272          | Traes_4AL_DD1B27086* | <i>Myosin-J heavy chain protein</i>                                     |
|           |                              | 4AL_7093716          |                      |                                                                         |
| <b>3</b>  | <i>Bradi1g00620</i>          | 4AL_7074626          | M28059 <sup>#</sup>  | <i>Ubiquitin Conjugating Enzyme (UBC)</i>                               |
| <b>4</b>  | Non-collinear                | 4AL_7074626          | Traes_4AL_65DF744B71 | <i>1 Aminocyclopropane carboxylate Oxidase-1-like (ACC – Oxidase-1)</i> |
| <b>5</b>  | <i>Bradi1g00670</i>          | 4AL_7095843          | Traes_4AL_F18648C49  | <i>Ethylene Responsive Factor 1B (ERF-1B)</i>                           |
| <b>6</b>  | <i>Bradi1g00677</i>          | 4AL_6230861          | Traes_4AL_02AE47773* | <i>Activating Signal Co-integrator 1 Like (ASC1-Like)</i>               |
|           |                              | 4AL_5621077          |                      |                                                                         |
| <b>7</b>  | <i>Bradi1g00690</i>          | 4AL_7159962          | Traes_4AL_2EBB63DBA  | <i>Serine threonine Protein Phosphatase 1-like (PP1-Like)</i>           |
| <b>8</b>  | <i>Bradi1g00700</i>          | 4AL_7162562          | Traes_4AL_C56125840  | <i>Phosphate Transporter</i>                                            |
| <b>9</b>  | <i>Bradi1g00710</i>          | 4AL_7177172          | Traes_4AL_DD344FC87  | <i>Hypothetical protein</i>                                             |
| <b>10</b> | <i>Bradi1g00720</i>          | 4AL_7172877          | Traes_4AL_F00707FAF  | <i>OTU cysteine Protease</i>                                            |

\*Gene model is split across two contigs.

<sup>#</sup> NCBI gene model used as no suitable gene model was found on EnsemblPlant



**Table S3: KASP SNP assays used to fine map *Phs-A1***

| <b>Gene</b>                  | <b>Robigus/Claire Specific Primer</b> | <b>Alchemy/Option Specific Primer</b> | <b>Common Primer</b>   |
|------------------------------|---------------------------------------|---------------------------------------|------------------------|
| <i>PM19_A2</i>               | GCACTCTGGGCTGTTGGc                    | GCACTCTGGGCTGTTGGt                    | TATCAGCCTGTCACTGTCGC   |
| <i>ACC Oxidase-1</i>         | CTCGTTGAAGCGCCGGAt                    | CTCGTTGAAGCGCCGGAc                    | CCAGGTGACGAACCACGA     |
| <i>PP1-like</i>              | GTCCTAGAGTTGAGACACTAATTTTAa           | GTCCTAGAGTTGAGACACTAATTTTAg           | AGACTTAACCAAGTCTCAGTCA |
| <i>OTU Cysteine Protease</i> | ACCGTTTCGGTTTCTTGTTc                  | ACCGTTTCGGTTTCTTGTTg                  | TTGAAGAAAAATGTTTCGCAGA |
| <i>STW17</i>                 | TTGCAGTCATGGTGTGATAAc                 | TTGCAGTCATGGTGTGATAAt                 | GCTAGCCACACACCGTCT     |

**Table S4: Statistical comparison of the sprouting scores of Option x Claire RILs in sprouting experiment 3.**

| Groups             | line   | %<br>Sprouting | Std<br>Error | Sig (P)<br>against<br>Option | Sig (P)<br>against<br>Claire | Phenotype<br>Classification |
|--------------------|--------|----------------|--------------|------------------------------|------------------------------|-----------------------------|
| Susceptible Parent | Claire | 70.6           | 8.3          | < 0.001                      | NA                           | High                        |
| Resistant Parent   | Option | 2.4            | 2.0          | NA                           | < 0.001                      | Low                         |
| Claire Control RIL | -      | 65.0           | 3.7          | < 0.001                      | 1.000                        | High                        |
| Option Control RIL | -      | 4.0            | 0.6          | 0.992                        | < 0.001                      | Low                         |
| RIL Group 11       | 4/204  | 0.0            | 0.0          | 1.000                        | < 0.001                      | Low                         |
| RIL Group 12       | 20/24  | 60.0           | 4.4          | < 0.001                      | 0.800                        | High                        |
|                    | 24/28  | 75.0           | 7.9          | < 0.001                      | 1.000                        | High                        |
|                    | 25/58  | 36.2           | 4.1          | < 0.001                      | 0.004                        | Moderate                    |
|                    | 4/95   | 74.5           | 5.3          | < 0.001                      | 1.000                        | High                        |
| RIL Group 13       | 21/46  | 4.6            | 1.0          | 0.856                        | < 0.001                      | Low                         |
| RIL Group 14       | 20/42  | 49.4           | 8.4          | < 0.001                      | 0.235                        | High                        |
|                    | 21/19  | 34.2           | 3.9          | < 0.001                      | 0.002                        | Moderate                    |
|                    | 22/57  | 73.5           | 4.3          | < 0.001                      | 1.000                        | High                        |
|                    | 26/8   | 37.2           | 7.2          | < 0.001                      | 0.005                        | Moderate                    |
| RIL Group 15       | 5/189  | 88.1           | 3.3          | < 0.001                      | 0.640                        | High                        |

**Table S5: Statistical comparison of the sprouting score of Option x Claire RILs in sprouting experiment 4.**

| Groups             | Line   | %<br>Sprouting | Std<br>Error | Sig (P)<br>against<br>Option | Sig (P)<br>against<br>Claire | Phenotype<br>Classification |
|--------------------|--------|----------------|--------------|------------------------------|------------------------------|-----------------------------|
| Susceptible Parent | Claire | 89.9           | 2.6          | < 0.001                      | NA                           | High                        |
| Resistant Parent   | Option | 0.7            | 0.2          | NA                           | < 0.001                      | Low                         |
| RIL Group 11       | 27/8   | 32.1           | 4.6          | < 0.001                      | < 0.001                      | Moderate                    |
|                    | 4/204  | 50.7           | 7.6          | < 0.001                      | 0.001                        | Moderate                    |
| RIL Group 12       | 20/24  | 93.6           | 1.0          | < 0.001                      | 1                            | High                        |
|                    | 24/28  | 95.4           | 0.8          | < 0.001                      | 0.982                        | High                        |
|                    | 25/58  | 97.8           | 0.2          | < 0.001                      | 0.917                        | High                        |
|                    | 4/95   | 96.4           | 1.2          | < 0.001                      | 0.884                        | High                        |
| RIL Group 13       | 21/46  | 49.8           | 7.3          | < 0.001                      | 0.024                        | Moderate                    |
|                    | 26/37  | 69.6           | 5.7          | < 0.001                      | 0.472                        | High                        |
| RIL Group 14       | 20/42  | 97.4           | 0.5          | < 0.001                      | 0.596                        | High                        |
|                    | 21/19  | 72.0           | 6.8          | < 0.001                      | 0.375                        | High                        |
|                    | 22/57  | 95.0           | 0.9          | < 0.001                      | 0.969                        | High                        |
|                    | 26/8   | 91.1           | 1.6          | < 0.001                      | 1                            | High                        |

**Table S6: Statistical comparison of the sprouting score of Alchemy x Robigus RILs in sprouting experiment 5.**

| Groups             | Line        | % Sprouting | Std Error | Sig (P) against Option | Sig (P) against Claire | Phenotype Classification |
|--------------------|-------------|-------------|-----------|------------------------|------------------------|--------------------------|
| Susceptible Parent | Robigus     | 84.4        | 3.3       | 0                      | NA                     | High                     |
| Resistant Parent   | Alchemy     | 18.5        | 7.8       | NA                     | 0                      | Low                      |
| RIL Group 21       | 3/70/3/27   | 15.9        | 0.8       | 0.982                  | 0.005                  | Low                      |
|                    | 3/101/6/31  | 9.0         | 0.9       | 1                      | 0.001                  | Low                      |
| RIL Group 22       | 3/63/1/22   | 86.4        | 0.9       | 0                      | 1                      | High                     |
|                    | 3/70/2/94   | 77.5        | 5.6       | 0.001                  | 1                      | High                     |
|                    | 3/72/3/54   | 76.6        | 5.8       | 0.001                  | 1                      | High                     |
|                    | 3/72/4/41   | 88.1        | 4.1       | 0                      | 1                      | High                     |
|                    | 3/101/9/23  | 78.4        | 5.8       | 0.001                  | 1                      | High                     |
|                    | 3/101/9/73  | 90.5        | 3.1       | 0                      | 1                      | High                     |
|                    | 3/124/6/81  | 84.2        | 6.0       | 0                      | 1                      | High                     |
|                    | 3/158/1/82  | 92.2        | 2.2       | 0                      | 0.992                  | High                     |
|                    | 3/158/2/67  | 93.3        | 1.7       | 0                      | 0.984                  | High                     |
|                    | 3/175/1/60  | 89.7        | 1.1       | 0                      | 1                      | High                     |
| RIL Group 23       | 3/101/6/48  | 2.6         | 0.9       | 0.92                   | 0                      | Low                      |
| RIL Group 24       | 3/148/2/4   | 5.4         | 0.3       | 1                      | 0                      | Low                      |
|                    | 3/172/10/92 | 11.4        | 7.5       | 0.986                  | 0                      | Low                      |
| RIL Group 25       | 3/106/9/2   | 81.7        | 4.2       | 0                      | 1                      | High                     |
|                    | 3/124/6/24  | 80.6        | 7.7       | 0.001                  | 1                      | High                     |
|                    | 3/124/6/74  | 93.9        | 1.6       | 0                      | 0.617                  | High                     |
|                    | 3/149/9/55  | 90.1        | 3.9       | 0                      | 0.87                   | High                     |
|                    | 3/158/1/38  | 88.5        | 5.7       | 0                      | 1                      | High                     |
|                    | 3/175/1/50  | 88.9        | 2.3       | 0                      | 1                      | High                     |
